# Supplementary material
Source: PubMed Central journal article supplement (PMC2999894)
Supplement: NIHMS32130-supplement-3.pdf [file NIHMS32130-supplement-3.pdf]

Manuscript #2010-08-10358B

List of 15 uploaded files:

|                            |                                                                         |
|----------------------------|-------------------------------------------------------------------------|
| cover_letter_revision.pdf  | Cover letter, including point-by-point discussion of Referees' comments |
| Maertens G et al.doc       | Revised manuscript (MS Word 97-2004)                                    |
| Fig1.tif                   | High-Resolution Figures (CMYK)                                          |
| Fig2.tif                   |                                                                         |
| Fig3.tif                   |                                                                         |
| Figure1_Maertens G.pptx    | Original MS PowerPoint Figure files*                                    |
| Figure2_Maertens G.pptx    |                                                                         |
| Figure3_Maertens G.pptx    |                                                                         |
| Supplementary_info.pdf     | Supplementary Table 1 and Suppl. Figures 1-8                            |
| Movie_1.mov                | Supplementary Movies (QuickTime)                                        |
| Movie_2.mov                |                                                                         |
| Colour_Art_form.pdf        | Colour Art form                                                         |
| AOP_form.pdf               | Advance online publication form                                         |
| Manuscript_checklist.pdf   | Manuscript checklist                                                    |
| List_of_uploaded_files.pdf | This file                                                               |

\*These files allow text editing; the embedded artwork is CMYK (or is very close to it). The figures files were created with PowerPoint 2007 (on Windows 7).
